# Supplementary material for: Genomic Analysis Reveals Novel Diversity among the 1976 Philadelphia Legionnaires’ Disease Outbreak Isolates and Additional ST36 Strains
Source: PubMed Central journal article supplement (PMC5042515; doi:10.1371/journal.pone.0164074), 2016-09-29
Supplement: pone.0164074.s002.pdf [file pone.0164074.s002.pdf]

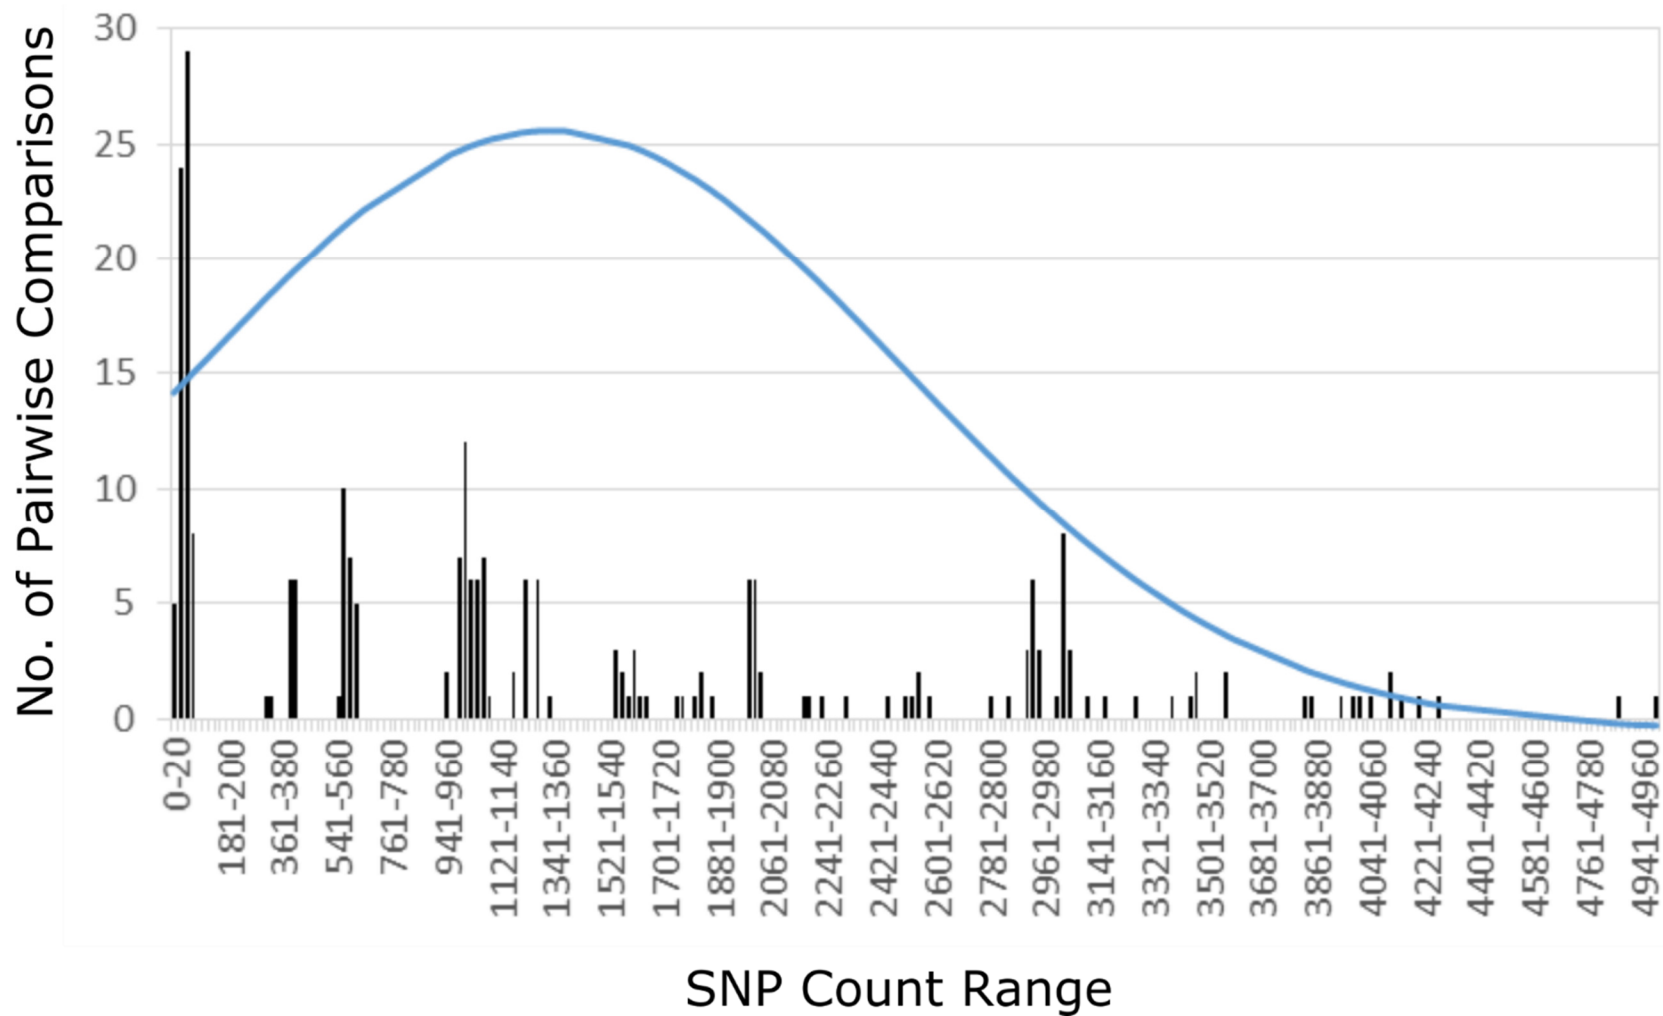

S2 Fig. SNP comparisons among epidemiologically unassociated *L. pneumophila* sg1 (ST36) isolates sequenced in the present study.
