# Supplementary material for: Genomic Analysis Reveals Novel Diversity among the 1976 Philadelphia Legionnaires’ Disease Outbreak Isolates and Additional ST36 Strains
Source: PubMed Central journal article supplement (PMC5042515; doi:10.1371/journal.pone.0164074), 2016-09-29
Supplement: pone.0164074.s004.pdf [file pone.0164074.s004.pdf]

**S1 Table. Genome characteristics and metadata of *L. pneumophila* sg1 (ST36) strains sequenced in the present study.**

| Strain or Isolate Designation | State of Origin | Source of Isolate        | Association | Date Originally Isolated or Received | Assembled Contigs | G+C Content (%) | Main Chromosome Size (bp) | No. of Putative Protein Coding Genes | Plasmids, No. (size in bp/G+C %) | NCBI Accession (PacBio chr./plas./SRA) | References/Notes                                                           |
|-------------------------------|-----------------|--------------------------|-------------|--------------------------------------|-------------------|-----------------|---------------------------|--------------------------------------|----------------------------------|----------------------------------------|----------------------------------------------------------------------------|
| Philadelphia-1 CDC            | Pennsylvania    | Autopsy lung tissue      | Outbreak    | 1/11/1977                            | 1                 | 38.33           | 3,408,562                 | 3024                                 | 0                                | CP015928/<br>SRR3613186                | McDade, et. al. (1977); Fraser, et. al. (1977)                             |
| Philadelphia-2                | Pennsylvania    | Autopsy lung tissue      | Outbreak    | 1/11/1977                            | 1                 | 38.35           | 3,447,085                 | 3062                                 | 1*<br>(37,889/40.02)             | CP015929/<br>SRR3613187                | McDade, et. al. (1977); Fraser, et. al. (1977)                             |
| Philadelphia-3                | Pennsylvania    | Autopsy lung tissue      | Outbreak    | 1/16/1977                            | 1                 | 38.33           | 3,409,008                 | 3024                                 | 0                                | CP015930/<br>SRR3613188                | McDade, et. al. (1977); Fraser, et. al. (1977)                             |
| Philadelphia-4                | Pennsylvania    | Autopsy lung tissue      | Outbreak    | 1/16/1977                            | 1                 | 38.35           | 3,447,082                 | 3062                                 | 1*<br>(37,889/40.02)             | CP015931/<br>SRR3613189                | McDade, et. al. (1977); Fraser, et. al. (1977)                             |
| Philadelphia-1 ATCC (33152)   | Pennsylvania    | Autopsy lung tissue      | Outbreak    | 1/11/1977                            | 1                 | 38.35           | 3,447,084                 | 3059                                 | 1*<br>(37,889/40.02)             | CP015927/<br>SRR3613190                | McDade, et. al. (1977); Fraser, et. al. (1977)                             |
| C1-S                          | North Carolina  | Clinical isolate, sputum | Sporadic    | 1/26/2009                            | 1                 | 38.38           | 3,457,332                 | 3070                                 | 0                                | CP015932/<br>SRR3613171                | Present study                                                              |
| C2-S                          | Illinois        | Clinical isolate, TTA    | Sporadic    | 11/6/2007                            | 1                 | 38.32           | 3,404,161                 | 3004                                 | 0                                | CP015933/<br>SRR3613172                | Present study                                                              |
| C3-O                          | Texas           | Clinical isolate         | Outbreak    | 6/7/2006                             | 1                 | 38.32           | 3,453,407                 | 3064                                 | 1*<br>/35,481/40.7               | CP015934/<br>SRR3613183                | Present study;<br>Additional outbreak pair 2;<br>Plasmid named here pO35TX |
| C4-S                          | Georgia         | Clinical isolate, BAL    | Sporadic    | 3/20/2000                            | 1                 | 38.26           | 3,409,361                 | 3021                                 | 0                                | CP015935/<br>SRR3613191                | Present study                                                              |

|       |            |                           |                    |            |   |       |           |      |                                    |                                                   |                                                                                    |
|-------|------------|---------------------------|--------------------|------------|---|-------|-----------|------|------------------------------------|---------------------------------------------------|------------------------------------------------------------------------------------|
| C5-P  | Ohio       | Clinical isolate, unknown | Potential Outbreak | 2/24/1998  | 1 | 38.31 | 3,419,718 | 3021 | 0                                  | CP015936/<br>SRR3613192                           | Present study;<br>Potential outbreak pair                                          |
| C6-S  | New Jersey | Clinical isolate, sputum  | Sporadic           | 1/22/1996  | 1 | 38.32 | 3,404,196 | 3006 | 0                                  | CP015937/<br>SRR3613193                           | Present study                                                                      |
| C7-O  | Delaware   | Clinical isolate, sputum  | Outbreak           | 8/10/1994  | 1 | 38.34 | 3,359,446 | 2970 | 0                                  | CP015938/<br>SRR3613194                           | Present study                                                                      |
| C8-S  | Colorado   | Clinical isolate, sputum  | Sporadic           | 3/12/1993  | 2 | 38.31 | 3,419,998 | 3077 | 1<br>(58,092/38.2)                 | CP015939/<br>CP015940/<br>SRR3613195              | Present study;<br>Plasmid named here pCCO, highly similar to pLPL, possible CRISPR |
| C9-S  | Indiana    | Clinical isolate, lung    | Sporadic           | 12/30/1982 | 3 | 38.30 | 3,397,139 | 3114 | 2<br>(33,359/39.6;<br>73,576/39.0) | CP015941/<br>CP015942/<br>CP015943/<br>SRR3613196 | Present study;<br>Smaller plasmid named here pCIN1, larger plasmid named pCIN2     |
| C10-S | Nebraska   | Clinical isolate, PF      | Sporadic           | 6/7/1990   | 1 | 38.33 | 3,368,319 | 2975 | 0                                  | CP015944/<br>SRR3613197                           | Present study                                                                      |
| C11-O | Georgia    | Clinical isolate, sputum  | Outbreak           | 3/18/2009  | 1 | 38.29 | 3,416,875 | 3025 | 0                                  | CP015945/<br>SRR3613173                           | Present study;<br>Additional outbreak pair 1;<br>Present study                     |
| E1-P  | California | Environmental isolate     | Potential Outbreak | 8/14/2013  | 1 | 38.34 | 3,411,341 | 3023 | 0                                  | CP015946/<br>SRR3613174                           | Present study                                                                      |
| E2-N  | Nevada     | Environmental isolate     | Non-outbreak       | 8/12/2012  | 2 | 38.32 | 3,336,955 | 3044 | 1<br>(71,453/39.09)                | CP015947/<br>CP015948/<br>SRR3613175              | Present study;<br>Plasmid named here pENV                                          |
| E3-N  | Texas      | Environmental isolate     | Non-outbreak       | 4/3/2011   | 1 | 38.33 | 3,465,352 | 3072 | 0                                  | CP015949/<br>SRR3613176                           | Present study                                                                      |
| E4-N  | Alabama    | Environmental isolate     | Non-outbreak       | 8/15/2012  | 1 | 38.33 | 3,416,757 | 3015 | 0                                  | CP015950/<br>SRR3613177                           | Present study                                                                      |

|       |            |                       |                       |           |   |       |           |      |                     |                                      |                                                                                  |
|-------|------------|-----------------------|-----------------------|-----------|---|-------|-----------|------|---------------------|--------------------------------------|----------------------------------------------------------------------------------|
| E5-N  | Arkansas   | Environmental isolate | Non-outbreak          | 8/3/2011  | 2 | 38.30 | 3,419,816 | 3101 | 1<br>(73,576/39.03) | CP015951/<br>CP015952/<br>SRR3613178 | Present study;<br>Plasmid same as<br>pCIN2                                       |
| E6-N  | New Jersey | Environmental isolate | Non-outbreak          | 4/6/2011  | 1 | 38.31 | 3,405,173 | 3005 | 0                   | CP015953/<br>SRR3613179              | Present study                                                                    |
| E7-O  | Georgia    | Environmental isolate | Outbreak              | 5/1/2009  | 1 | 38.34 | 3,425,962 | 3032 | 0                   | CP015954/<br>SRR3613180              | Present study;<br>Additional<br>outbreak pair 1                                  |
| E8-O  | Texas      | Environmental isolate | Outbreak              | 6/20/2006 | 1 | 38.34 | 3,455,562 | 3063 | 1*<br>/35,481/40.7  | CP015955/<br>SRR3613181              | Present study;<br>Additional<br>outbreak pair 2;<br>plasmid named<br>here pO35TX |
| E9-O  | Illinois   | Environmental isolate | Outbreak              | 8/31/2012 | 2 | 38.32 | 3,367,202 | 3028 | 1<br>(48,354/38.39) | CP015956/<br>CP015957/<br>SRR3613182 | Present study;<br>plasmid named<br>here pOIL                                     |
| E10-P | Ohio       | Environmental isolate | Potential<br>Outbreak | 2/23/2007 | 1 | 38.32 | 3,415,557 | 3020 | 0                   | CP015925/<br>SRR3613184              | Present study;<br>Potential<br>outbreak pair                                     |
| E11-U | Iowa       | Environmental isolate | Unknown               | 10/4/2006 | 1 | 38.31 | 3,402,052 | 3032 | 0                   | CP015926/<br>SRR3613185              | Present study                                                                    |

Footnotes: 1. \*, Potential mobilizable, self-replicating plasmid may appear in both integrated and extrachromosomal forms

2. PF, pleural fluid; TTA, trans-tracheal aspirate; BL, bronchial alveolar lavage
